# Supplementary material for: Influence of sample collection tube method, anticoagulant-containing plasma versus serum, on influenza virus hemagglutination inhibition titer and microneutralization titer serological assays
Source: BMC Health Serv Res. 2018 Aug 22;18:651. doi: 10.1186/s12913-018-3465-3 (PMC6103864; doi:10.1186/s12913-018-3465-3)
Supplement: Supplementary file 1 — HAI and MN Titer Values. HAI and MN titer values for all influenza types for the thirty matched samples and for the six collection tube methods. (XLSX 27 kb) [file 12913_2018_3465_MOESM1_ESM.xlsx]

## Sheet: RAW DATA
		Additional File 1
		HAI and MN Titer Values
SAMPLE			Type A H1N1		Type A H3N2			Type B
		SAMPLE-TYPE	HAI	MN		HAI		HAI	MN
1		ACDPLAS	160	640		160		40	320
		RTSERA	160	640		160		56.5685	452.548
		HEPPLAS	160	905.097		160		40	452.548
		CITPLAS	160	640		160		40	452.548
		SSTSERA	160	640		160		40	452.548
		EDTAPLAS	320	452.548		226.274		320	640
2		ACDPLAS	80	160		40		20	113.137
		RTSERA	80	320		40		20	113.137
		HEPPLAS	80	320		40		20	80
		CITPLAS	80	226.274		40		20	56.5685
		SSTSERA	80	160		80		20	56.5685
		EDTAPLAS	80	320		80		80	113.137
3		ACDPLAS	40	113.137		56.5685		80	1280
		RTSERA	40	113.137		80		160	1280
		HEPPLAS	40	226.274		80		160	1280
		CITPLAS	40	226.274		80		160	1280
		SSTSERA	40	226.274		80		160	1280
		EDTAPLAS	80	320		80		160	1280
4		ACDPLAS	320	40		320		160	452.548
		RTSERA	320	40		320		160	1280
		HEPPLAS	320	80		320		160	905.097
		CITPLAS	320	80		320		160	905.097
		SSTSERA	320	56.5685		320		160	905.097
		EDTAPLAS	320	80		452.548		320	905.097
5		ACDPLAS	20	452.548		40		10	80
		RTSERA	20	452.548		40		10	80
		HEPPLAS	20	640		40		10	40
		CITPLAS	20	640		40		10	40
		SSTSERA	20	320		40		80	56.5685
		EDTAPLAS	20	320		80		80	56.5685
6		ACDPLAS	160	80		40		40	320
		RTSERA	160	113.137		40		80	452.548
		HEPPLAS	160	160		80		80	452.548
		CITPLAS	160	80		40		80	452.548
		SSTSERA	160	80		56.5685		80	640
		EDTAPLAS	160	80		113.137		160	320
7		ACDPLAS	40	160		40		10	113.137
		RTSERA	80	160		56.5685		10	113.137
		HEPPLAS	40	320		40		40	40
		CITPLAS	40	160		40		10	40
		SSTSERA	40	160		40		10	40
		EDTAPLAS	80	113.137		80		160	56.5685
8		ACDPLAS	40	80		160		28.2843	320
		RTSERA	40	160		160		28.2843	160
		HEPPLAS	40	160		320		10	160
		CITPLAS	40	160		113.137		10	80
		SSTSERA	40	80		113.137		10	80
		EDTAPLAS	40	113.137		320		80	113.137
9		ACDPLAS	10	5		20		5	80
		RTSERA	10	7.07107		20		10	80
		HEPPLAS	10	7.07107		20		10	40
		CITPLAS	10	5		20		5	20
		SSTSERA	10	5		20		10	20
		EDTAPLAS	20	5		40		40	40
10		ACDPLAS	20	40		40		20	226.274
		RTSERA	40	80		40		10	160
		HEPPLAS	20	80		40		10	80
		CITPLAS	40	80		40		20	80
		SSTSERA	40	80		40		20	80
		EDTAPLAS	40	40		80		160	113.137
11		ACDPLAS	640	1280		320		40	1280
		RTSERA	640	1280		320		40	905.097
		HEPPLAS	640	1280		320		40	1280
		CITPLAS	640	1280		320		40	905.097
		SSTSERA	640	1280		640		56.5685	1280
		EDTAPLAS	640	1280		320		160	1280
12		ACDPLAS	80	160		80		40	226.274
		RTSERA	160	160		80		40	320
		HEPPLAS	160	320		80		40	320
		CITPLAS	80	160		80		56.5685	320
		SSTSERA	160	160		80		40	320
		EDTAPLAS	160	160		160		160	320
13		ACDPLAS	160	160		160		40	160
		RTSERA	160	320		160		40	320
		HEPPLAS	160	320		160		40	320
		CITPLAS	160	226.274		160		40	320
		SSTSERA	160	320		160		40	320
		EDTAPLAS	160	226.274		320		113.137	320
14		ACDPLAS	80	160		160		113.137	1280
		RTSERA	160	226.274		320		40	1280
		HEPPLAS	160	226.274		160		40	1280
		CITPLAS	160	226.274		160		160	1280
		SSTSERA	160	226.274		320		56.5685	1280
		EDTAPLAS	160	226.274		640		320	1280
15		ACDPLAS	160	160		320		40	905.097
		RTSERA	160	160		320		40	905.097
		HEPPLAS	160	226.274		320		40	905.097
		CITPLAS	160	160		320		80	640
		SSTSERA	160	320		640		80	905.097
		EDTAPLAS	160	226.274		640		226.274	905.097
16		ACDPLAS	40	56.5685		320		20	160
		RTSERA	40	80		320		10	453
		HEPPLAS	40	113.137		320		10	640
		CITPLAS	40	80		320		10	160
		SSTSERA	80	80		320		10	640
		EDTAPLAS	80	80		640		160	320
17		ACDPLAS	640	320		640		20	1280
		RTSERA	640	640		905.097		14.1421	1280
		HEPPLAS	640	640		640		20	1280
		CITPLAS	640	452.548		1280		20	1280
		SSTSERA	640	452.548		1280		20	1280
		EDTAPLAS	640	320		640		160	1280
18		ACDPLAS	20	40		320		40	453
		RTSERA	20	80		640		20	453
		HEPPLAS	20	80		640		40	905
		CITPLAS	20	57		640		20	453
		SSTSERA	40	57		640		20	905
		EDTAPLAS	40	80		640		160	320
19		ACDPLAS	320	453		80		80	1280
		RTSERA	640	1280		320		160	1280
		HEPPLAS	320	1280		160		80	1280
		CITPLAS	320	640		160		80	1280
		SSTSERA	640	640		160		160	1280
		EDTAPLAS	320	640		160		320	1280
20		ACDPLAS	160	160		320		40	1280
		RTSERA	160	226		320		40	1280
		HEPPLAS	160	320		320		40	1280
		CITPLAS	160	226		320		40	1280
		SSTSERA	160	320		320		40	1280
		EDTAPLAS	320	320		905.097		320	1280
21		ACDPLAS	160	226		320		40	320
		RTSERA	160	320		640		40	453
		HEPPLAS	160	453		640		40	453
		CITPLAS	160	320		226.274		40	320
		SSTSERA	160	320		226.274		40	320
		EDTAPLAS	160	320		226.274		160	320
22		ACDPLAS	80	160		160		40	226
		RTSERA	80	160		160		40	226
		HEPPLAS	80	160		160		40	160
		CITPLAS	80	226		160		40	226
		SSTSERA	80	160		160		40	160
		EDTAPLAS	80	160		320		160	226
23		ACDPLAS	80	226		80		10	113
		RTSERA	80	320		160		10	113
		HEPPLAS	80	453		80		10	80
		CITPLAS	80	320		160		10	113
		SSTSERA	80	640		160		10	160
		EDTAPLAS	80	226		160		80	80
24		ACDPLAS	80	320		80		40	453
		RTSERA	80	320		113.137		40	640
		HEPPLAS	80	453		160		40	640
		CITPLAS	80	320		80		40	320
		SSTSERA	80	640		160		40	640
		EDTAPLAS	80	320		160		160	320
25		ACDPLAS	40	226		320		40	160
		RTSERA	40	320		640		40	160
		HEPPLAS	40	320		640		40	226
		CITPLAS	40	320		640		40	113
		SSTSERA	80	320		640		40	320
		EDTAPLAS	80	226		640		160	160
26		ACDPLAS	80	453		80		10	113
		RTSERA	80	320		80		10	160
		HEPPLAS	80	453		80		10	160
		CITPLAS	80	320		80		10	113
		SSTSERA	80	453		80		10	160
		EDTAPLAS	80	453		80		80	113
27		ACDPLAS	40	160		56.5685		10	80
		RTSERA	40	160		80		10	80
		HEPPLAS	40	160		80		10	80
		CITPLAS	40	226		80		10	80
		SSTSERA	40	320		80		10	80
		EDTAPLAS	40	160		80		80	80
28		ACDPLAS	10	10		40		20	226
		RTSERA	10	14		40		20	226
		HEPPLAS	5	20		20		20	320
		CITPLAS	5	14		40		40	226
		SSTSERA	5	14		40		20	226
		EDTAPLAS	10	14		80		160	226
29		ACDPLAS	320	57		80		40	160
		RTSERA	160	80		80		20	226
		HEPPLAS	320	320		80		40	320
		CITPLAS	5	80		5		5	113
		SSTSERA	640	80		160		80	226
		EDTAPLAS	320	80		160		160	160
30		ACDPLAS	160	113		160		20	80
		RTSERA	160	113		160		20	113
		HEPPLAS	160	160		160		20	160
		CITPLAS	160	160		160		20	113
		SSTSERA	160	160		160		40	160
		EDTAPLAS	160	160		160		160	160
		Above two-dilutions from SST
		Below two-dilutions from SST
